# Supplementary material for: Autophagy Modulation in Human Thyroid Cancer Cells following Aloperine Treatment
Source: MDPI journal article supplement (doi:10.3390/ijms20215315), 2019-10-25
Supplement: s1 [file s1]

Supplementary Data 1.

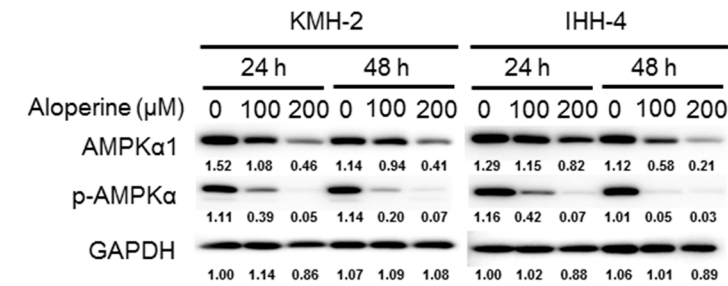

**Supplementary Data.** AMPK Signaling pathway modulation in human thyroid cancer cells following aloperine treatment. Cells were incubated with aloperine and the expression of AMPK and phospho-AMPK were examined. DMSO was used as a negative control. Numbers under the plots indicate the quantification of protein intensity after normalization with GAPDH. Two independent experiments were performed, and results of one of these are shown.
